# Supplementary material for: Identification of a Hypoxia-Related Gene Signature for Predicting Systemic Metastasis in Prostate Cancer
Source: Front Cell Dev Biol. 2021 Oct 13;9:696364. doi: 10.3389/fcell.2021.696364 (PMC8548828; doi:10.3389/fcell.2021.696364)
Supplement: Supplementary file 6 [file Data_Sheet_2.XLSX]

## Sheet: ssGSEAout
id	TCGA-G9-6356-11A-01R-1789-07	TCGA-EJ-7785-11A-01R-2118-07	TCGA-G9-6384-11A-01R-1858-07	TCGA-EJ-7328-11A-01R-2118-07	TCGA-EJ-7793-11A-01R-2263-07	TCGA-EJ-7781-11A-01R-2118-07	TCGA-HC-7752-11A-01R-2118-07	TCGA-G9-6351-11A-01R-1965-07	TCGA-HC-7819-11A-01R-2118-07	TCGA-HC-7747-11A-01R-2118-07	TCGA-EJ-7123-11A-01R-1965-07	TCGA-G9-6362-11A-01R-1789-07	TCGA-EJ-7784-11A-01R-2118-07	TCGA-J4-A83J-11A-11R-A36G-07	TCGA-G9-6365-11A-01R-1789-07	TCGA-HC-7211-11A-01R-2118-07	TCGA-CH-5761-11A-01R-1580-07	TCGA-EJ-7115-11A-01R-2118-07	TCGA-G9-6333-11A-01R-1965-07	TCGA-HC-8262-11A-01R-2263-07	TCGA-HC-8260-11A-01R-2263-07	TCGA-HC-7740-11A-01R-2118-07	TCGA-EJ-7331-11A-01R-2118-07	TCGA-EJ-7794-11A-01R-2118-07	TCGA-EJ-7314-11A-01R-2118-07	TCGA-EJ-7786-11A-01R-2118-07	TCGA-EJ-7792-11A-01R-2118-07	TCGA-EJ-7315-11A-01R-2118-07	TCGA-CH-5767-11B-01R-1789-07	TCGA-EJ-7797-11A-01R-2263-07	TCGA-CH-5768-11A-01R-1580-07	TCGA-EJ-7789-11A-01R-2118-07	TCGA-HC-8259-11A-01R-2263-07	TCGA-HC-7737-11A-02R-2118-07	TCGA-EJ-7327-11A-01R-2118-07	TCGA-G9-6499-11A-02R-1965-07	TCGA-EJ-7782-11A-01R-2118-07	TCGA-CH-5769-11A-01R-1580-07	TCGA-HC-7742-11A-01R-2118-07	TCGA-EJ-7330-11A-01R-2118-07	TCGA-G9-6348-11A-01R-1789-07	TCGA-G9-6496-11A-01R-1789-07	TCGA-G9-6363-11A-01R-1789-07	TCGA-HC-7745-11A-01R-2118-07	TCGA-EJ-7321-11A-01R-2263-07	TCGA-HC-7738-11A-01R-2118-07	TCGA-EJ-7125-11A-01R-1965-07	TCGA-HC-8258-11A-01R-2263-07	TCGA-EJ-7317-11A-01R-2118-07
HALLMARK_TNFA_SIGNALING_VIA_NFKB	0.312815	0.252729	0.273887	0.302249	0.263182	0.298388	0.231008	0.200797	0.199774	0.184447	0.245992	0.233584	0.308065	0.487864	0.355573	0.238075	0.276868	0.201165	0.250086	0.520592	0.212399	0.216352	0.239929	0.379171	0.326123	0.366125	0.302182	0.356006	0.472239	0.257183	0.200354	0.258218	0.204379	0.238111	0.175814	0.229982	0.323994	0.258584	0.211431	0.334228	0.215986	0.247954	0.212115	0.212546	0.300784	0.225718	0.206508	0.212825	0.206816
HALLMARK_HYPOXIA	0.261569	0.292412	0.2726	0.317761	0.291596	0.331491	0.250372	0.249332	0.243927	0.188237	0.310799	0.219712	0.298736	0.343674	0.28627	0.19524	0.257692	0.2404	0.267697	0.387112	0.264876	0.214014	0.284162	0.325744	0.308347	0.345524	0.301088	0.330747	0.310921	0.28854	0.245391	0.274709	0.249449	0.262519	0.224818	0.244387	0.273324	0.286496	0.247393	0.317038	0.235959	0.271407	0.248302	0.240105	0.292136	0.226146	0.242496	0.205622	0.247361
HALLMARK_CHOLESTEROL_HOMEOSTASIS	0.246621	0.26254	0.272927	0.230904	0.276004	0.227416	0.208935	0.246516	0.264031	0.226428	0.217	0.209795	0.256833	0.253448	0.25806	0.234979	0.25554	0.25865	0.22526	0.269642	0.300245	0.223643	0.250176	0.248817	0.253474	0.252621	0.247403	0.232271	0.25344	0.266535	0.251534	0.300553	0.237719	0.243855	0.276093	0.234341	0.286357	0.283478	0.253674	0.234599	0.209662	0.231417	0.269759	0.20873	0.28288	0.21358	0.253944	0.235906	0.324716
HALLMARK_MITOTIC_SPINDLE	0.206645	0.261437	0.203342	0.299843	0.267982	0.348372	0.231791	0.193083	0.265017	0.134241	0.288034	0.184376	0.299351	0.265685	0.184467	0.128481	0.256625	0.224472	0.208435	0.30186	0.237608	0.158023	0.281426	0.355346	0.300758	0.331615	0.304163	0.364737	0.244184	0.224828	0.266077	0.237805	0.216354	0.185222	0.237877	0.193327	0.215734	0.306454	0.231803	0.264444	0.198608	0.178712	0.254922	0.190981	0.265277	0.160426	0.133825	0.115243	0.254895
HALLMARK_WNT_BETA_CATENIN_SIGNALING	0.244377	0.250565	0.224454	0.253597	0.245888	0.262293	0.258086	0.234994	0.263767	0.189562	0.239248	0.218076	0.267772	0.279793	0.23397	0.195855	0.266007	0.238659	0.246392	0.289785	0.254085	0.203146	0.252692	0.280135	0.259247	0.270792	0.274595	0.285212	0.252421	0.238264	0.256506	0.246003	0.235346	0.204506	0.241058	0.217903	0.233206	0.242428	0.240743	0.263911	0.241045	0.230966	0.244603	0.220815	0.264874	0.200458	0.198223	0.17851	0.243845
HALLMARK_TGF_BETA_SIGNALING	0.254854	0.267854	0.241714	0.271049	0.250265	0.300106	0.227279	0.230039	0.253249	0.203259	0.25438	0.22321	0.284939	0.286634	0.270196	0.183892	0.256698	0.243892	0.258323	0.307809	0.238244	0.22066	0.267829	0.32698	0.280303	0.316675	0.292443	0.308509	0.280635	0.242828	0.26248	0.274516	0.232837	0.215364	0.24586	0.235619	0.271685	0.255032	0.240849	0.286643	0.222033	0.227267	0.2679	0.241225	0.271912	0.214065	0.23064	0.201422	0.256944
HALLMARK_IL6_JAK_STAT3_SIGNALING	0.24952	0.269537	0.225315	0.273882	0.265211	0.318041	0.253839	0.210866	0.229404	0.209441	0.233353	0.208683	0.285584	0.29832	0.220018	0.207668	0.258031	0.230402	0.223754	0.322593	0.219636	0.223437	0.278982	0.335173	0.280109	0.323463	0.301194	0.381832	0.293057	0.265075	0.21231	0.268124	0.229156	0.232573	0.227774	0.227757	0.312268	0.241769	0.226201	0.309656	0.212248	0.210128	0.211828	0.218672	0.262264	0.213137	0.237157	0.202137	0.228712
HALLMARK_DNA_REPAIR	0.226147	0.260373	0.172694	0.18965	0.229402	0.203916	0.206476	0.19847	0.211799	0.130885	0.136729	0.176213	0.230467	0.215608	0.212905	0.144068	0.227826	0.230496	0.226606	0.244908	0.227439	0.14737	0.201703	0.232415	0.197903	0.198866	0.253392	0.243638	0.203429	0.274973	0.238986	0.238138	0.233052	0.166045	0.234134	0.209517	0.273614	0.239626	0.202442	0.222027	0.191888	0.183223	0.230957	0.1459	0.21619	0.129323	0.273841	0.137436	0.205113
HALLMARK_G2M_CHECKPOINT	0.20646	0.232656	0.163741	0.221657	0.225517	0.256184	0.191072	0.17169	0.222914	0.119648	0.196104	0.218593	0.248961	0.210888	0.191427	0.13828	0.221396	0.20361	0.198974	0.26524	0.208221	0.149115	0.223062	0.277708	0.238823	0.235227	0.249178	0.292266	0.22924	0.21429	0.240638	0.215049	0.201115	0.157257	0.226006	0.226863	0.221407	0.36451	0.206799	0.212273	0.166591	0.158052	0.269434	0.149037	0.209494	0.145951	0.172505	0.117107	0.210239
HALLMARK_APOPTOSIS	0.291722	0.28321	0.253574	0.29118	0.273422	0.314418	0.232255	0.228244	0.239114	0.204079	0.244391	0.225887	0.303986	0.323747	0.259027	0.214058	0.260426	0.242457	0.250745	0.3764	0.250812	0.221942	0.273902	0.332397	0.289391	0.324484	0.302784	0.340629	0.317484	0.277544	0.237735	0.287055	0.241242	0.243367	0.236581	0.229125	0.311994	0.255986	0.233476	0.309855	0.214204	0.23095	0.244841	0.218387	0.287076	0.209944	0.25576	0.206731	0.248343
HALLMARK_NOTCH_SIGNALING	0.241037	0.262499	0.232008	0.268726	0.254054	0.289911	0.256684	0.238793	0.254434	0.193395	0.253662	0.231612	0.273465	0.266429	0.236381	0.191914	0.264918	0.245507	0.245889	0.263526	0.244	0.207904	0.26208	0.289277	0.263589	0.275584	0.272125	0.282217	0.255942	0.259927	0.249834	0.250289	0.243658	0.211572	0.245896	0.254921	0.246754	0.231484	0.235738	0.263446	0.242173	0.232506	0.235409	0.222337	0.260988	0.204333	0.234663	0.189918	0.24408
HALLMARK_ADIPOGENESIS	0.229985	0.302857	0.230461	0.278892	0.270994	0.268684	0.225236	0.242025	0.243413	0.19524	0.262885	0.191786	0.261641	0.23447	0.218455	0.206093	0.235576	0.268157	0.23151	0.306787	0.255828	0.207608	0.270271	0.250292	0.263176	0.254671	0.282685	0.263448	0.231062	0.294232	0.239708	0.289388	0.251581	0.23933	0.268788	0.221788	0.292423	0.260162	0.245142	0.26924	0.22375	0.231497	0.24743	0.224027	0.248727	0.210357	0.301398	0.19768	0.255222
HALLMARK_ESTROGEN_RESPONSE_EARLY	0.310987	0.263307	0.253587	0.271492	0.260635	0.288294	0.236653	0.239494	0.258573	0.24554	0.248977	0.183466	0.305546	0.315408	0.28793	0.258129	0.294893	0.269303	0.280048	0.425901	0.257626	0.264088	0.260475	0.345928	0.28465	0.305815	0.290211	0.317834	0.350377	0.241182	0.277667	0.274153	0.224409	0.307938	0.242842	0.252662	0.263986	0.23775	0.262664	0.28204	0.206981	0.247927	0.244845	0.268605	0.285153	0.256273	0.20435	0.250692	0.263361
HALLMARK_ESTROGEN_RESPONSE_LATE	0.318761	0.267338	0.248464	0.264118	0.265193	0.278332	0.248477	0.238569	0.254499	0.266591	0.239193	0.208575	0.295954	0.298059	0.305717	0.284185	0.284792	0.266739	0.288608	0.399672	0.262249	0.287752	0.258207	0.320573	0.274874	0.278973	0.284911	0.290894	0.321598	0.262713	0.264432	0.274982	0.228929	0.315517	0.245185	0.262119	0.269925	0.264998	0.260009	0.279868	0.216302	0.265314	0.263873	0.281762	0.27655	0.272967	0.232088	0.27563	0.251094
HALLMARK_ANDROGEN_RESPONSE	0.238678	0.259565	0.22739	0.205916	0.283366	0.220095	0.182851	0.256705	0.256844	0.147993	0.187579	0.240339	0.283944	0.219149	0.200816	0.151061	0.239722	0.248781	0.179416	0.234845	0.283267	0.158866	0.259767	0.241479	0.260002	0.248165	0.254345	0.239233	0.217853	0.263059	0.247068	0.293102	0.245888	0.173628	0.309731	0.222833	0.285827	0.241692	0.260722	0.212002	0.174501	0.201173	0.23329	0.152483	0.265065	0.153855	0.253539	0.149796	0.317426
HALLMARK_MYOGENESIS	0.212222	0.323289	0.294936	0.405724	0.291651	0.389037	0.304926	0.268965	0.26337	0.229881	0.598715	0.196568	0.26263	0.295541	0.24654	0.217443	0.245059	0.271564	0.286928	0.269309	0.262027	0.246908	0.34587	0.314104	0.314899	0.356773	0.302326	0.326167	0.262897	0.283652	0.241136	0.246899	0.266064	0.259375	0.212259	0.246725	0.233682	0.230639	0.250138	0.333946	0.322648	0.298492	0.25993	0.322364	0.270448	0.256883	0.225531	0.219206	0.248843
HALLMARK_PROTEIN_SECRETION	0.226608	0.290627	0.21403	0.233601	0.283623	0.272554	0.178827	0.227308	0.268751	0.193063	0.20983	0.212465	0.307832	0.196229	0.199463	0.196267	0.245293	0.262212	0.210621	0.242017	0.267993	0.207948	0.285116	0.279266	0.269266	0.274054	0.296978	0.292406	0.229862	0.27407	0.281585	0.310275	0.262339	0.234454	0.326092	0.234549	0.323505	0.242082	0.261092	0.24256	0.170323	0.196815	0.250928	0.189507	0.261066	0.191818	0.285001	0.190981	0.294876
HALLMARK_INTERFERON_ALPHA_RESPONSE	0.282216	0.2556	0.203329	0.251118	0.23984	0.263261	0.239915	0.196868	0.217114	0.171071	0.191038	0.17495	0.274087	0.270983	0.227584	0.172437	0.249813	0.216328	0.226914	0.267521	0.207701	0.205453	0.255657	0.300014	0.239046	0.244498	0.280407	0.319889	0.269534	0.25978	0.211376	0.278726	0.224664	0.210134	0.216848	0.201859	0.285328	0.217117	0.21273	0.272699	0.201727	0.208171	0.212439	0.196491	0.272507	0.188446	0.242084	0.193	0.213993
HALLMARK_INTERFERON_GAMMA_RESPONSE	0.291636	0.275662	0.203828	0.278608	0.253797	0.315053	0.242006	0.18081	0.205286	0.162801	0.204323	0.168581	0.301294	0.297392	0.216415	0.162238	0.260101	0.210683	0.220146	0.31973	0.193537	0.203245	0.274154	0.350618	0.265759	0.294222	0.318059	0.414848	0.288632	0.267029	0.196969	0.287001	0.219083	0.215929	0.20105	0.216634	0.334556	0.221908	0.206128	0.32338	0.192025	0.197348	0.203825	0.182888	0.277093	0.178633	0.248625	0.183185	0.205324
HALLMARK_APICAL_JUNCTION	0.243866	0.29207	0.269943	0.353525	0.29074	0.384195	0.301339	0.244756	0.283867	0.188502	0.366505	0.170341	0.300421	0.30955	0.234943	0.165506	0.264104	0.26457	0.27256	0.325662	0.271053	0.221974	0.326356	0.362762	0.314674	0.357672	0.338759	0.395525	0.277775	0.270553	0.254063	0.274465	0.248909	0.248356	0.234399	0.234533	0.262172	0.25434	0.262702	0.33069	0.272485	0.267304	0.27011	0.299022	0.295728	0.216453	0.194794	0.161672	0.261698
HALLMARK_APICAL_SURFACE	0.288802	0.266174	0.257149	0.277058	0.263357	0.288696	0.257	0.252518	0.270976	0.250117	0.256389	0.205956	0.285753	0.278849	0.266148	0.2504	0.269734	0.259633	0.277169	0.317191	0.256627	0.247736	0.274122	0.299839	0.273947	0.27653	0.284882	0.306362	0.279309	0.253577	0.273395	0.262925	0.245257	0.278491	0.25241	0.228428	0.262921	0.245135	0.257345	0.284951	0.247605	0.268127	0.249737	0.260877	0.289472	0.255973	0.230646	0.261041	0.260343
HALLMARK_HEDGEHOG_SIGNALING	0.235023	0.245399	0.234611	0.27018	0.245172	0.280023	0.236759	0.228863	0.244774	0.2368	0.255441	0.228611	0.264586	0.273437	0.225027	0.227844	0.247745	0.233528	0.229029	0.267281	0.24052	0.247577	0.260298	0.292763	0.2618	0.275581	0.260982	0.284934	0.253389	0.227681	0.239464	0.239544	0.241303	0.27451	0.235362	0.219403	0.225571	0.239721	0.244948	0.266874	0.23152	0.23383	0.235282	0.250128	0.264668	0.244814	0.19343	0.231404	0.246536
HALLMARK_COMPLEMENT	0.268752	0.292724	0.22869	0.293719	0.299436	0.336855	0.258976	0.212453	0.22965	0.214255	0.278638	0.189168	0.309175	0.280707	0.232908	0.220387	0.266118	0.240229	0.238083	0.339474	0.228427	0.250049	0.300612	0.366593	0.278457	0.334743	0.329364	0.413904	0.279639	0.283498	0.223924	0.287855	0.249238	0.251699	0.226558	0.225047	0.334438	0.235862	0.237031	0.333904	0.22193	0.22788	0.231982	0.236962	0.270543	0.224041	0.257276	0.204508	0.235056
HALLMARK_UNFOLDED_PROTEIN_RESPONSE	0.230931	0.233705	0.193853	0.197379	0.230778	0.203912	0.176705	0.199255	0.215838	0.163932	0.159141	0.230841	0.236872	0.219695	0.212619	0.207365	0.223402	0.218865	0.198883	0.25476	0.228186	0.170682	0.220218	0.229426	0.230169	0.220613	0.244869	0.233529	0.223208	0.233199	0.222068	0.243248	0.21952	0.184496	0.247532	0.222044	0.238272	0.264649	0.23024	0.21076	0.166665	0.184546	0.243804	0.166362	0.222727	0.175389	0.224705	0.187874	0.228105
HALLMARK_PI3K_AKT_MTOR_SIGNALING	0.242207	0.270844	0.215245	0.257939	0.252319	0.279082	0.215112	0.21151	0.232559	0.149754	0.247344	0.217768	0.263984	0.237052	0.206009	0.157825	0.248424	0.241097	0.222368	0.296652	0.227415	0.166641	0.258197	0.271301	0.260744	0.264726	0.278634	0.305654	0.227832	0.252348	0.237811	0.264554	0.224321	0.178691	0.255626	0.229836	0.276053	0.257199	0.236192	0.265972	0.205913	0.20128	0.248077	0.180697	0.243782	0.157853	0.232781	0.137767	0.241911
HALLMARK_MTORC1_SIGNALING	0.243451	0.263201	0.2124	0.208851	0.259056	0.218326	0.166971	0.210001	0.228576	0.157895	0.183862	0.242386	0.253923	0.208683	0.20796	0.195251	0.222091	0.235341	0.202977	0.30182	0.24803	0.168692	0.239198	0.235063	0.248179	0.2338	0.247284	0.25792	0.221744	0.262367	0.217513	0.283158	0.219062	0.194302	0.26875	0.23284	0.289746	0.318917	0.241425	0.226201	0.158946	0.194278	0.277363	0.157535	0.234609	0.158347	0.262859	0.173578	0.270529
HALLMARK_E2F_TARGETS	0.196294	0.246406	0.145033	0.203745	0.224596	0.236415	0.185558	0.161279	0.200541	0.124959	0.156123	0.222833	0.239393	0.202202	0.185685	0.134892	0.20827	0.204254	0.194796	0.263057	0.194964	0.153808	0.204239	0.259865	0.227991	0.215502	0.244957	0.285847	0.221677	0.240932	0.220042	0.2109	0.195182	0.166786	0.220975	0.224522	0.239789	0.378125	0.185751	0.215408	0.153871	0.149266	0.273543	0.13966	0.187328	0.141894	0.217831	0.122612	0.187152
HALLMARK_MYC_TARGETS_V1	0.191415	0.235975	0.128719	0.149553	0.192238	0.153906	0.15294	0.154943	0.161783	0.0570222	0.100322	0.254912	0.190102	0.129741	0.162936	0.0817489	0.170886	0.194623	0.183288	0.228085	0.182316	0.0829875	0.167309	0.177939	0.170698	0.148557	0.208381	0.188129	0.17376	0.246793	0.210904	0.210238	0.187853	0.0967621	0.20672	0.244256	0.249635	0.319545	0.188314	0.187761	0.137399	0.141837	0.293953	0.0715033	0.151017	0.0656875	0.277312	0.0715588	0.168443
HALLMARK_MYC_TARGETS_V2	0.216162	0.204555	0.172967	0.1809	0.2028	0.173367	0.187126	0.191975	0.189752	0.132555	0.145858	0.195422	0.199384	0.198254	0.218959	0.153364	0.206468	0.203934	0.212367	0.275462	0.201921	0.144445	0.182448	0.202002	0.188129	0.174081	0.204386	0.196068	0.200905	0.207409	0.206169	0.191496	0.184271	0.145048	0.19561	0.24944	0.199099	0.284567	0.210726	0.193214	0.184677	0.188304	0.235958	0.151985	0.185917	0.142916	0.198974	0.142841	0.186019
HALLMARK_EPITHELIAL_MESENCHYMAL_TRANSITION	0.206268	0.307499	0.270917	0.392747	0.293227	0.460032	0.316381	0.241224	0.241797	0.199947	0.395343	0.210957	0.283963	0.314368	0.228449	0.171115	0.211285	0.248402	0.280172	0.303763	0.233518	0.233059	0.345444	0.387872	0.346192	0.453446	0.340644	0.42129	0.262542	0.311005	0.216389	0.265516	0.254449	0.259236	0.198305	0.282407	0.27855	0.248773	0.236185	0.37412	0.285874	0.307056	0.266479	0.307495	0.286355	0.23935	0.232786	0.17846	0.232618
HALLMARK_INFLAMMATORY_RESPONSE	0.276003	0.268846	0.222766	0.281386	0.269315	0.346088	0.235973	0.196858	0.215794	0.201596	0.245986	0.186523	0.308996	0.33391	0.224571	0.208931	0.272768	0.230062	0.23722	0.399719	0.208769	0.223506	0.276122	0.40696	0.297368	0.371262	0.320909	0.427886	0.344257	0.257935	0.22429	0.271209	0.213704	0.245723	0.200833	0.234197	0.354256	0.237167	0.221962	0.344708	0.199606	0.212885	0.212268	0.221736	0.2691	0.212373	0.230872	0.208118	0.215192
HALLMARK_XENOBIOTIC_METABOLISM	0.254898	0.270866	0.229469	0.250756	0.263025	0.261372	0.230284	0.239553	0.240869	0.239219	0.206936	0.186683	0.255248	0.261654	0.23822	0.264316	0.255544	0.260488	0.234595	0.310156	0.256634	0.240454	0.264126	0.27216	0.249463	0.269972	0.282762	0.286384	0.246568	0.27117	0.240001	0.278656	0.251233	0.251221	0.252323	0.210288	0.283666	0.248437	0.244713	0.264551	0.218484	0.236864	0.243175	0.244961	0.259561	0.23191	0.263138	0.260279	0.247375
HALLMARK_FATTY_ACID_METABOLISM	0.237932	0.287279	0.232182	0.235525	0.267713	0.227876	0.198084	0.238122	0.23813	0.204803	0.223141	0.198322	0.246005	0.209528	0.21827	0.213894	0.239069	0.26564	0.230549	0.254372	0.268467	0.219391	0.251873	0.224688	0.237755	0.216616	0.254621	0.234025	0.215291	0.285758	0.240788	0.288564	0.253692	0.221324	0.272223	0.210921	0.288992	0.259825	0.240168	0.2371	0.209199	0.228206	0.256779	0.202518	0.24919	0.197865	0.305624	0.206713	0.26607
HALLMARK_OXIDATIVE_PHOSPHORYLATION	0.19702	0.294335	0.174106	0.201917	0.233242	0.181525	0.188109	0.2176	0.185668	0.151559	0.189894	0.211634	0.19721	0.148785	0.19043	0.192238	0.185137	0.242987	0.22185	0.208574	0.233259	0.155256	0.204878	0.161987	0.194976	0.151932	0.228183	0.177099	0.160567	0.311829	0.214791	0.261686	0.238939	0.177373	0.234746	0.216039	0.312526	0.265331	0.206972	0.22674	0.203251	0.211603	0.267456	0.160391	0.19275	0.159197	0.392438	0.164155	0.202437
HALLMARK_GLYCOLYSIS	0.243643	0.262487	0.205453	0.239822	0.253053	0.248943	0.214974	0.225077	0.235271	0.188415	0.212762	0.18679	0.260687	0.233578	0.238599	0.22449	0.258588	0.24066	0.233408	0.310619	0.242562	0.202218	0.253404	0.261439	0.243512	0.260254	0.26352	0.274429	0.235235	0.2551	0.232098	0.267164	0.226451	0.211479	0.242925	0.241582	0.264353	0.286707	0.254164	0.247903	0.1889	0.231149	0.267196	0.210173	0.245961	0.192292	0.247598	0.189546	0.234475
HALLMARK_REACTIVE_OXYGEN_SPECIES_PATHWAY	0.239288	0.252528	0.224827	0.243589	0.248151	0.240011	0.226049	0.233003	0.231737	0.187342	0.221894	0.209747	0.236313	0.236904	0.227085	0.186896	0.232152	0.235221	0.234041	0.248097	0.240869	0.205969	0.242747	0.234023	0.230118	0.233322	0.248753	0.254665	0.228031	0.258013	0.22611	0.261386	0.244289	0.201318	0.238378	0.225015	0.266244	0.249578	0.238305	0.253474	0.220996	0.229498	0.232881	0.204843	0.239573	0.189155	0.261431	0.186396	0.232018
HALLMARK_P53_PATHWAY	0.335348	0.26888	0.229087	0.248033	0.251316	0.25494	0.232985	0.218045	0.242439	0.184413	0.203637	0.200037	0.301025	0.363498	0.288513	0.202076	0.277261	0.248046	0.288477	0.483602	0.247658	0.196357	0.23823	0.319077	0.264315	0.277035	0.286931	0.309139	0.356507	0.26833	0.263413	0.272076	0.230571	0.239285	0.230487	0.217634	0.28854	0.245467	0.222338	0.295424	0.209088	0.220885	0.250198	0.198627	0.269279	0.19006	0.243662	0.190889	0.227306
HALLMARK_UV_RESPONSE_UP	0.263446	0.251863	0.233625	0.246416	0.248391	0.237158	0.2154	0.230065	0.212936	0.191762	0.208755	0.216785	0.241806	0.27601	0.254679	0.217708	0.236421	0.224789	0.241095	0.312532	0.23689	0.199549	0.2322	0.253516	0.24038	0.249306	0.260782	0.267677	0.252538	0.244023	0.217559	0.248868	0.232541	0.198242	0.212003	0.221115	0.258425	0.241216	0.222505	0.253979	0.21812	0.227081	0.239953	0.206363	0.244365	0.209938	0.231273	0.192115	0.219242
HALLMARK_UV_RESPONSE_DN	0.231214	0.321396	0.254843	0.364422	0.298614	0.436093	0.279059	0.240642	0.278029	0.189812	0.378369	0.229102	0.328176	0.286455	0.216865	0.179165	0.250442	0.264818	0.250427	0.333856	0.260761	0.222585	0.328783	0.40577	0.342	0.409753	0.350921	0.411861	0.287653	0.289899	0.287751	0.281048	0.249841	0.230389	0.246956	0.255526	0.279625	0.227473	0.246197	0.342161	0.251386	0.23317	0.246435	0.260178	0.288242	0.229168	0.221493	0.179978	0.277494
HALLMARK_ANGIOGENESIS	0.221178	0.246871	0.232017	0.269619	0.247853	0.269186	0.255762	0.223906	0.235409	0.273461	0.246156	0.237147	0.245266	0.263124	0.233556	0.262901	0.235597	0.230281	0.241583	0.266329	0.229775	0.25948	0.263473	0.28069	0.258357	0.287429	0.263302	0.277056	0.234203	0.249086	0.221469	0.240798	0.232767	0.259799	0.222057	0.230069	0.24561	0.244682	0.228377	0.282074	0.232901	0.235742	0.234072	0.276237	0.238752	0.271945	0.22684	0.281485	0.2279
HALLMARK_HEME_METABOLISM	0.237433	0.292113	0.216915	0.250883	0.265129	0.276432	0.214189	0.223895	0.246868	0.197449	0.251145	0.184904	0.289925	0.255826	0.225068	0.194103	0.258266	0.254141	0.236081	0.303167	0.252506	0.210963	0.265087	0.298035	0.257913	0.277839	0.296904	0.303141	0.249828	0.26576	0.265791	0.287168	0.241048	0.245892	0.26094	0.224468	0.289146	0.234687	0.24056	0.269225	0.201844	0.20723	0.237723	0.208061	0.26199	0.198608	0.242092	0.209344	0.260652
HALLMARK_COAGULATION	0.230872	0.267363	0.235755	0.284946	0.273518	0.303885	0.257403	0.222933	0.237253	0.222929	0.26315	0.185475	0.261673	0.269483	0.239315	0.213721	0.242633	0.246982	0.247615	0.272948	0.232371	0.264399	0.28231	0.30901	0.266746	0.3234	0.291862	0.329123	0.249925	0.268663	0.225124	0.256657	0.241162	0.268641	0.218985	0.234715	0.283857	0.243233	0.233086	0.310889	0.23743	0.244526	0.245714	0.254617	0.260071	0.214367	0.239165	0.210587	0.229902
HALLMARK_IL2_STAT5_SIGNALING	0.25303	0.26829	0.236713	0.290023	0.2616	0.32325	0.245932	0.214718	0.223123	0.197832	0.261542	0.212296	0.285385	0.310282	0.238093	0.2114	0.241184	0.230248	0.245252	0.352388	0.227677	0.228655	0.275044	0.346232	0.290724	0.333085	0.307738	0.38695	0.304023	0.259339	0.225138	0.266352	0.225019	0.266026	0.202938	0.233892	0.306227	0.23895	0.220632	0.315938	0.219148	0.236218	0.235689	0.230202	0.271061	0.221247	0.22013	0.201964	0.22224
HALLMARK_BILE_ACID_METABOLISM	0.233839	0.278789	0.234966	0.249844	0.264127	0.265648	0.220865	0.242531	0.25211	0.215191	0.234261	0.206384	0.267078	0.244403	0.236767	0.204731	0.243615	0.260429	0.227716	0.256696	0.26426	0.241254	0.268176	0.268386	0.252668	0.261815	0.272442	0.270123	0.231221	0.268639	0.2524	0.290521	0.252276	0.242179	0.2647	0.221276	0.290173	0.222204	0.248389	0.257066	0.210637	0.23058	0.234632	0.223262	0.271811	0.215273	0.267663	0.202021	0.264491
HALLMARK_PEROXISOME	0.252216	0.265779	0.227036	0.226604	0.250082	0.232281	0.215181	0.240208	0.245813	0.194995	0.20214	0.212207	0.252536	0.223663	0.242998	0.185478	0.241503	0.252375	0.226019	0.254293	0.255055	0.210853	0.256094	0.247122	0.23733	0.232975	0.257346	0.248069	0.229603	0.265309	0.249555	0.285638	0.245675	0.191193	0.26686	0.226676	0.279558	0.237398	0.243824	0.238385	0.206992	0.236624	0.24987	0.196894	0.254263	0.185928	0.262004	0.181533	0.257411
HALLMARK_ALLOGRAFT_REJECTION	0.270544	0.275923	0.190349	0.261877	0.253204	0.336611	0.250709	0.184169	0.200897	0.143288	0.220218	0.187705	0.282436	0.284941	0.214959	0.140974	0.244549	0.210749	0.219116	0.291904	0.190705	0.165417	0.272041	0.343488	0.256964	0.306299	0.312532	0.49372	0.274399	0.258418	0.193989	0.262014	0.202496	0.179226	0.19643	0.216625	0.370233	0.238605	0.206026	0.332551	0.194722	0.195635	0.216858	0.171923	0.255482	0.156495	0.249846	0.156811	0.192458
HALLMARK_SPERMATOGENESIS	0.231362	0.266126	0.217165	0.246949	0.255801	0.276983	0.227317	0.225455	0.239812	0.206865	0.246101	0.235958	0.27034	0.235852	0.249235	0.220682	0.232121	0.235131	0.216443	0.247558	0.252634	0.228056	0.243579	0.276461	0.242222	0.256497	0.265691	0.278178	0.244786	0.253789	0.243708	0.250488	0.234749	0.223567	0.232995	0.23192	0.269276	0.245334	0.229698	0.254815	0.21699	0.209254	0.240094	0.211248	0.240026	0.236685	0.228943	0.21118	0.236501
HALLMARK_KRAS_SIGNALING_UP	0.246952	0.295718	0.215785	0.301184	0.279136	0.35638	0.255464	0.205365	0.229268	0.240312	0.269071	0.248087	0.306942	0.296653	0.232711	0.24211	0.256501	0.241946	0.243769	0.344929	0.218439	0.271857	0.288526	0.376329	0.297045	0.358077	0.326727	0.414866	0.286464	0.278639	0.243632	0.282656	0.23151	0.269043	0.223903	0.239241	0.332129	0.242909	0.228514	0.341587	0.215595	0.233076	0.240173	0.262315	0.265964	0.255086	0.24404	0.244203	0.235304
HALLMARK_KRAS_SIGNALING_DN	0.300407	0.269549	0.237262	0.276741	0.253976	0.284999	0.24904	0.239722	0.256024	0.238518	0.296072	0.205131	0.288552	0.302115	0.291663	0.23555	0.269641	0.252336	0.280283	0.357052	0.273396	0.297769	0.262662	0.310248	0.258204	0.26939	0.272273	0.308365	0.306057	0.252952	0.277509	0.265319	0.232389	0.308755	0.226585	0.233029	0.284206	0.224154	0.241761	0.277974	0.242759	0.261586	0.23728	0.261506	0.279675	0.256836	0.220227	0.245066	0.241674
HALLMARK_PANCREAS_BETA_CELLS	0.237809	0.255838	0.22875	0.251136	0.248228	0.260379	0.233353	0.243945	0.234919	0.237763	0.235396	0.315552	0.247834	0.231096	0.246931	0.241779	0.235625	0.24095	0.237221	0.236606	0.23478	0.26276	0.245315	0.250211	0.238706	0.242332	0.250627	0.260129	0.236432	0.253525	0.246111	0.244656	0.238464	0.236684	0.233932	0.248036	0.254202	0.236511	0.24366	0.254896	0.229524	0.23843	0.253776	0.236353	0.229072	0.242081	0.250004	0.219068	0.235145
[truncated: 491 more columns]

## Sheet: full-uicox
id	HR.95L	HR	HR.95H	pvalue
HALLMARK_E2F_TARGETS	11.6147	71.9596	445.829	4.32e-06
HALLMARK_DNA_REPAIR	1257.39	259205	5.34339e+07	4.54e-06
HALLMARK_UV_RESPONSE_UP	23084.2	4.84739e+07	101789000000	5.78e-06
HALLMARK_G2M_CHECKPOINT	14.3529	116.878	951.764	8.6e-06
HALLMARK_MYC_TARGETS_V1	10.277	184.495	3312.12	0.000398123
HALLMARK_REACTIVE_OXYGEN_SPECIES_PATHWAY	2465.69	4.91674e+07	980431000000	0.000454687
HALLMARK_MITOTIC_SPINDLE	21.1902	1050.44	52071.8	0.000477284
HALLMARK_SPERMATOGENESIS	417.319	1.39116e+06	4637537308	0.000631164
HALLMARK_MYC_TARGETS_V2	22.529	2439.94	264252	0.00110217
HALLMARK_ANGIOGENESIS	50.7413	102766	2.08132e+08	0.00296987
HALLMARK_PI3K_AKT_MTOR_SIGNALING	29.3154	84158.9	2.41604e+08	0.00524644
HALLMARK_HYPOXIA	13.3169	8114.97	4.94504e+06	0.00593583
HALLMARK_GLYCOLYSIS	11.1805	7849.15	5.51043e+06	0.00732014
HALLMARK_INTERFERON_ALPHA_RESPONSE	3.17344	104.719	3455.55	0.00912582
HALLMARK_MTORC1_SIGNALING	3.09057	203.296	13372.7	0.0128376
HALLMARK_INTERFERON_GAMMA_RESPONSE	1.90245	24.0471	303.956	0.014016
HALLMARK_P53_PATHWAY	3.32569	1720.26	889827	0.0194449
HALLMARK_OXIDATIVE_PHOSPHORYLATION	1.83355	72.9283	2900.68	0.0224556
HALLMARK_INFLAMMATORY_RESPONSE	1.5172	30.122	598.032	0.0255245
HALLMARK_IL2_STAT5_SIGNALING	1.71012	127.74	9541.72	0.0275404
HALLMARK_HEME_METABOLISM	2.55306	5822.04	1.32767e+07	0.027981
HALLMARK_COMPLEMENT	1.61462	96.5953	5778.86	0.0285626
HALLMARK_COAGULATION	1.97535	945.61	452669	0.0295424
HALLMARK_APICAL_JUNCTION	1.7724	447.089	112778	0.0305567
HALLMARK_WNT_BETA_CATENIN_SIGNALING	2.08176	50624.5	1231093568	0.0355303
HALLMARK_NOTCH_SIGNALING	1.88059	4.82961e+06	12403100000000	0.0409695
HALLMARK_UNFOLDED_PROTEIN_RESPONSE	1.3273	1443.17	1.56916e+06	0.0414159
HALLMARK_IL6_JAK_STAT3_SIGNALING	1.05713	74.9353	5311.84	0.0470868
HALLMARK_APOPTOSIS	0.664065	256.991	99455	0.0679552
HALLMARK_TNFA_SIGNALING_VIA_NFKB	0.797369	21.0521	555.819	0.0680939
HALLMARK_ALLOGRAFT_REJECTION	0.841701	6.81193	55.1292	0.0721084
HALLMARK_EPITHELIAL_MESENCHYMAL_TRANSITION	0.657506	15.7239	376.028	0.0889276
HALLMARK_XENOBIOTIC_METABOLISM	0.303803	1911.78	1.20306e+07	0.0904527
HALLMARK_HEDGEHOG_SIGNALING	0.0736942	9356.58	1187957740	0.127253
HALLMARK_ADIPOGENESIS	0.177806	376.844	798684	0.129015
HALLMARK_KRAS_SIGNALING_UP	0.243497	30.2255	3751.92	0.16584
HALLMARK_ANDROGEN_RESPONSE	1.97e-05	0.0131297	8.75196	0.191528
HALLMARK_FATTY_ACID_METABOLISM	0.0835529	83.5944	83636	0.209221
HALLMARK_TGF_BETA_SIGNALING	0.0555982	153.241	422369	0.213125
HALLMARK_ESTROGEN_RESPONSE_LATE	0.0286894	240.106	2.00949e+06	0.234296
HALLMARK_CHOLESTEROL_HOMEOSTASIS	0.0291487	83.4775	239067	0.275951
HALLMARK_KRAS_SIGNALING_DN	0.0149817	46.9508	147138	0.34868
HALLMARK_PEROXISOME	0.00539715	90.3173	1.51139e+06	0.364103
HALLMARK_PROTEIN_SECRETION	0.00131181	0.167262	21.3267	0.469733
HALLMARK_PANCREAS_BETA_CELLS	0.000152961	139.385	1.27014e+08	0.480701
HALLMARK_UV_RESPONSE_DN	0.0170613	3.1471	580.508	0.666698
HALLMARK_MYOGENESIS	0.01457	0.498074	17.0266	0.698901
HALLMARK_ESTROGEN_RESPONSE_EARLY	0.00196247	4.41088	9914	0.706252
HALLMARK_APICAL_SURFACE	5.09e-05	9.26304	1.68532e+06	0.718673
HALLMARK_BILE_ACID_METABOLISM	6.93e-05	2.09659	63428.6	0.888158

## Sheet: Z-socre
id	HALLMARK_HYPOXIA	z-score	risk	fustat	futime	average	stdevp	median
TCGA-HC-7752-01	0.114847	-3.53372	low	0	2.14247	0.233686	0.0336301	-0.0546747
TCGA-V1-A9OT-01	0.148181	-2.54253	low	1	0.8
TCGA-X4-A8KS-01	0.157109	-2.27706	low	0	2.68219
TCGA-G9-6343-01	0.160067	-2.18909	low	0	6.71233
TCGA-KK-A6E8-01	0.160724	-2.16957	low	0	4.84932
TCGA-M7-A722-01	0.161693	-2.14073	low	1	1.53151
TCGA-YL-A8S9-01	0.166077	-2.01039	low	1	2.75616
TCGA-G9-6362-01	0.1672	-1.977	low	0	3.95342
TCGA-KK-A7AW-01	0.169569	-1.90655	low	0	2.88767
TCGA-QU-A6IN-01	0.17038	-1.88243	low	0	11.6822
TCGA-MG-AAMC-01	0.171164	-1.85913	low	0	0.473973
TCGA-KK-A8IK-01	0.172258	-1.82658	low	0	5.62192
TCGA-EJ-7325-01	0.174943	-1.74674	low	0	2.93151
TCGA-2A-A8VX-01	0.175037	-1.74395	low	0	3.77534
TCGA-H9-A6BY-01	0.176044	-1.714	low	0	0.306849
TCGA-V1-A9OQ-01	0.176095	-1.71249	low	0	1.01644
TCGA-VP-A87B-01	0.177847	-1.6604	low	1	6.77534
TCGA-EJ-A7NF-01	0.178415	-1.6435	low	0	0.684932
TCGA-VN-A88M-01	0.180881	-1.57019	low	0	0.517808
TCGA-G9-6369-01	0.182167	-1.53193	low	0	3.32877
TCGA-VN-A943-01	0.182755	-1.51445	low	0	1.3589
TCGA-HC-7075-01	0.184242	-1.47023	low	0	1.64658
TCGA-G9-6496-01	0.184779	-1.45428	low	0	4.72877
TCGA-VP-A875-01	0.185631	-1.42893	low	0	6.32603
TCGA-EJ-A65G-01	0.186136	-1.41392	low	0	1.82466
TCGA-FC-A6HD-01	0.186345	-1.40771	low	0	2.16164
TCGA-G9-6332-01	0.186542	-1.40186	low	1	3.23288
TCGA-V1-A8WS-01	0.18711	-1.38497	low	0	1.29863
TCGA-EJ-7312-01	0.187381	-1.3769	low	0	3.01096
TCGA-XJ-A83G-01	0.188132	-1.35457	low	0	4.00274
TCGA-G9-6354-01	0.188507	-1.34343	low	0	5.66027
TCGA-EJ-7317-01	0.189475	-1.31463	low	0	2.11233
TCGA-J4-A67K-01	0.189626	-1.31013	low	0	2.75068
TCGA-QU-A6IL-01	0.189753	-1.30637	low	0	0.265753
TCGA-XK-AAJP-01	0.189793	-1.30517	low	0	3.44932
TCGA-HC-8259-01	0.190028	-1.2982	low	0	2.53151
TCGA-HC-8213-01	0.190133	-1.29506	low	0	1.6137
TCGA-G9-6371-01	0.190228	-1.29225	low	0	3.3589
TCGA-EJ-A46F-01	0.191032	-1.26834	low	1	0.589041
TCGA-EJ-7218-01	0.192018	-1.23901	low	0	6.96438
TCGA-KK-A6E4-01	0.192099	-1.2366	low	0	9.59452
TCGA-V1-A9OF-01	0.192749	-1.21728	low	0	3.24384
TCGA-2A-AAYF-01	0.193026	-1.20906	low	0	3.73699
TCGA-TP-A8TV-01	0.193515	-1.19452	low	0	1.67123
TCGA-HC-A6AN-01	0.193653	-1.19039	low	0	0.134247
TCGA-KK-A8I8-01	0.194339	-1.17	low	0	2.64932
TCGA-HC-A6AQ-01	0.194533	-1.16422	low	0	0.290411
TCGA-HC-8261-01	0.194874	-1.1541	low	0	1.49589
TCGA-M7-A71Z-01	0.195057	-1.14865	low	0	1.76164
TCGA-XJ-A83F-01	0.195457	-1.13676	low	0	3.08767
TCGA-HI-7169-01	0.195544	-1.13418	low	0	7.35342
TCGA-QU-A6IO-01	0.196196	-1.11479	low	0	10.1808
TCGA-2A-A8VO-01	0.19624	-1.11348	low	0	4.66027
TCGA-J4-AAU2-01	0.196348	-1.11027	low	0	2.26027
TCGA-EJ-A8FS-01	0.196564	-1.10384	low	1	0.591781
TCGA-VP-A87D-01	0.196839	-1.09566	low	1	3.27123
TCGA-HC-A76X-01	0.196873	-1.09464	low	0	0.410959
TCGA-EJ-7123-01	0.197391	-1.07925	low	0	7.04658
TCGA-G9-6366-01	0.197465	-1.07704	low	0	5.33425
TCGA-M7-A724-01	0.197655	-1.0714	low	0	2.43562
TCGA-2A-A8W1-01	0.197736	-1.069	low	0	0.306849
TCGA-KC-A7FD-01	0.198543	-1.04501	low	0	0.739726
TCGA-HC-7078-01	0.199033	-1.03042	low	0	5.43836
TCGA-WW-A8ZI-01	0.199057	-1.02972	low	0	1.23014
TCGA-HC-8256-01	0.19918	-1.02605	low	0	2.35616
TCGA-CH-5748-01	0.199518	-1.01602	low	0	0.0849315
TCGA-KK-A7AZ-01	0.200061	-0.999863	low	0	4.16164
TCGA-HC-8262-01	0.200095	-0.998838	low	0	1.86027
TCGA-KK-A5A1-01	0.200275	-0.993505	low	1	0.556164
TCGA-KK-A8IF-01	0.200664	-0.981918	low	1	1.77534
TCGA-ZG-A9LM-01	0.200841	-0.976671	low	0	1.03562
TCGA-YL-A8HM-01	0.201548	-0.955626	low	1	4.03562
TCGA-G9-7525-01	0.201713	-0.95074	low	0	2.72329
TCGA-XK-AAJ3-01	0.201944	-0.943856	low	0	3.45753
TCGA-HC-A6HY-01	0.202448	-0.92887	low	0	0.367123
TCGA-YL-A8SQ-01	0.202636	-0.923287	low	1	0.90137
TCGA-VP-A876-01	0.202699	-0.921404	low	0	9.13151
TCGA-HC-8257-01	0.202765	-0.919446	low	0	1.98904
TCGA-HC-7738-01	0.203084	-0.909972	low	1	1.15068
TCGA-HC-7819-01	0.20381	-0.888391	low	0	1.48767
TCGA-G9-6373-01	0.204042	-0.881471	low	0	2.22192
TCGA-VN-A88N-01	0.204128	-0.878914	low	0	2.09863
TCGA-2A-A8VV-01	0.204278	-0.874474	low	0	1.83836
TCGA-EJ-7318-01	0.204302	-0.87374	low	1	1.0411
TCGA-V1-A9ZI-01	0.205086	-0.850443	low	0	4.49315
TCGA-Y6-A9XI-01	0.205317	-0.843555	low	0	1.4411
TCGA-QU-A6IM-01	0.205522	-0.837472	low	0	3.41644
TCGA-KK-A6E2-01	0.205573	-0.835957	low	0	13.7644
TCGA-XJ-A9DX-01	0.205607	-0.834941	low	0	2.66575
TCGA-KC-A7F5-01	0.206263	-0.815435	low	0	0.249315
TCGA-V1-A9OH-01	0.206557	-0.806683	low	0	6.58356
TCGA-CH-5772-01	0.206931	-0.795588	low	0	1.33151
TCGA-G9-A9S4-01	0.207783	-0.770239	low	0	2.48219
TCGA-KK-A7AP-01	0.208037	-0.762681	low	0	0.536986
TCGA-CH-5768-01	0.208048	-0.762373	low	0	2.00274
TCGA-HC-7820-01	0.208053	-0.762205	low	0	2.04658
TCGA-J4-A67N-01	0.208512	-0.74857	low	1	1.21096
TCGA-KK-A6E5-01	0.208648	-0.744532	low	0	5.67945
TCGA-V1-A9OX-01	0.208707	-0.74278	low	0	3.10685
TCGA-EJ-8474-01	0.208759	-0.741226	low	0	2.09863
TCGA-KK-A8ID-01	0.208782	-0.740544	low	0	5.7726
TCGA-HC-7750-01	0.2089	-0.737014	low	0	1.43014
TCGA-2A-AAYU-01	0.208951	-0.735518	low	0	1.68493
TCGA-KK-A7AY-01	0.209001	-0.734025	low	1	3.07945
TCGA-V1-A8MF-01	0.20902	-0.733467	low	0	3.96986
TCGA-HC-A6AL-01	0.209212	-0.727764	low	0	0.183562
TCGA-HC-7749-01	0.20941	-0.721865	low	0	1.98356
TCGA-HC-7744-01	0.209703	-0.713158	low	0	1.45479
TCGA-KK-A59Z-01	0.209777	-0.710959	low	0	7.2
TCGA-G9-6329-01	0.210217	-0.697875	low	0	3.46849
TCGA-V1-A8MM-01	0.210341	-0.694173	low	1	2.71233
TCGA-KK-A7AQ-01	0.210386	-0.692831	low	1	3.33425
TCGA-HC-A632-01	0.210535	-0.688417	low	0	0.167123
TCGA-J4-A6M7-01	0.211066	-0.67262	low	0	1.40274
TCGA-FC-A5OB-01	0.211318	-0.665131	low	0	1.86301
TCGA-HC-7230-01	0.211437	-0.661587	low	0	2.74247
TCGA-2A-AAYO-01	0.211546	-0.658341	low	0	3.48493
TCGA-G9-A9S7-01	0.21177	-0.651695	low	0	1.99452
TCGA-EJ-5532-01	0.211779	-0.651423	low	0	5.00822
TCGA-EJ-5504-01	0.212427	-0.632137	low	0	3.90959
TCGA-YL-A8SH-01	0.212458	-0.631227	low	0	2.39726
TCGA-YL-A9WI-01	0.21299	-0.615417	low	0	4.44658
TCGA-HC-A6AO-01	0.213174	-0.609942	low	0	1.45205
TCGA-M7-A721-01	0.213319	-0.60563	low	0	1.09589
TCGA-CH-5746-01	0.213371	-0.60409	low	0	2.00274
TCGA-CH-5767-01	0.213764	-0.592403	low	0	1.25479
TCGA-HC-A8CY-01	0.21384	-0.590122	low	0	0.794521
TCGA-EJ-5505-01	0.213868	-0.589306	low	0	2.52603
TCGA-KC-A7FA-01	0.214034	-0.584364	low	0	1.63836
TCGA-YL-A8SL-01	0.214297	-0.576533	low	0	2.70411
TCGA-CH-5741-01	0.214302	-0.576403	low	0	1.08219
TCGA-YL-A8SA-01	0.214521	-0.569897	low	0	1.40274
TCGA-XK-AAJA-01	0.214618	-0.566987	low	0	2.54795
TCGA-EJ-7321-01	0.214658	-0.565811	low	0	2.25753
TCGA-2A-A8W3-01	0.215034	-0.554628	low	1	0.542466
TCGA-EJ-7115-01	0.215049	-0.554191	low	0	7.36164
TCGA-VN-A88Q-01	0.215133	-0.551701	low	0	3.74247
TCGA-V1-A9Z9-01	0.215203	-0.549591	low	0	1.47945
TCGA-G9-7519-01	0.21523	-0.5488	low	0	2.32603
TCGA-Y6-A8TL-01	0.215325	-0.545969	low	0	2.71781
TCGA-G9-6499-01	0.215343	-0.545457	low	0	4.2274
TCGA-EJ-5496-01	0.215499	-0.54079	low	0	1.63014
TCGA-V1-A8ML-01	0.215625	-0.537066	low	0	1.2274
TCGA-HC-7077-01	0.215694	-0.535009	low	0	5.79452
TCGA-QU-A6IP-01	0.215769	-0.532787	low	0	7.17808
TCGA-EJ-7786-01	0.215977	-0.526582	low	0	3.00274
TCGA-EJ-7784-01	0.216152	-0.521384	low	0	2.13973
TCGA-EJ-7788-01	0.216651	-0.50654	low	0	2.35342
TCGA-KK-A7AU-01	0.216841	-0.500889	low	1	0.567123
TCGA-J9-A8CN-01	0.217241	-0.489019	low	0	3.38904
TCGA-EJ-A7NH-01	0.217293	-0.48746	low	0	1.29863
TCGA-HI-7171-01	0.217496	-0.481409	low	1	3.6411
TCGA-G9-6378-01	0.217559	-0.479545	low	0	3.16438
TCGA-CH-5765-01	0.217755	-0.473722	low	0	1.91781
TCGA-EJ-5530-01	0.217773	-0.473181	low	0	5.01918
TCGA-M7-A725-01	0.217851	-0.470867	low	0	1.56986
TCGA-VN-A88P-01	0.218066	-0.464472	low	0	3.45205
TCGA-G9-6339-01	0.218124	-0.462761	low	1	4.47671
TCGA-EJ-A65M-01	0.218682	-0.446144	low	0	0.630137
TCGA-KK-A59Y-01	0.218783	-0.443161	low	0	5.39178
TCGA-KK-A7B0-01	0.2189	-0.439681	low	1	1.66027
TCGA-HC-7231-01	0.219024	-0.435972	low	0	2.5726
TCGA-EJ-7789-01	0.219159	-0.431973	low	0	3.0274
TCGA-YL-A8SC-01	0.219371	-0.425663	low	1	0.416438
TCGA-X4-A8KQ-01	0.219594	-0.419052	low	0	3.78904
TCGA-XK-AAIW-01	0.220093	-0.404195	low	1	1.16986
TCGA-HC-8216-01	0.220131	-0.403084	low	0	1.86849
TCGA-J4-A83N-01	0.22035	-0.396544	low	1	1.1863
TCGA-J4-A83K-01	0.220452	-0.39353	low	0	0.89863
TCGA-G9-6494-01	0.220848	-0.381758	low	0	4.85205
TCGA-G9-6351-01	0.220936	-0.379146	low	0	5.61096
TCGA-YL-A8HL-01	0.221396	-0.365467	low	0	4.28767
TCGA-H9-7775-01	0.221469	-0.363282	low	0	0.506849
TCGA-EJ-5511-01	0.221561	-0.360536	low	0	4.04384
TCGA-XJ-A9DQ-01	0.221791	-0.353711	low	0	0.249315
TCGA-EJ-7125-01	0.221989	-0.347824	low	0	7.80822
TCGA-J4-A67S-01	0.221996	-0.347618	low	1	1.93973
TCGA-G9-6342-01	0.222186	-0.341951	low	0	4.64658
TCGA-ZG-A9KY-01	0.222248	-0.34011	low	0	0.356164
TCGA-EJ-5517-01	0.222272	-0.339392	low	0	5.17534
TCGA-V1-A8MG-01	0.222689	-0.327018	low	0	2.34795
TCGA-KK-A8IA-01	0.222779	-0.324332	low	0	5.29041
TCGA-J9-A8CP-01	0.222822	-0.323065	low	0	1.05753
TCGA-YL-A8SO-01	0.223402	-0.305817	low	0	9.53151
TCGA-EJ-7793-01	0.223404	-0.305757	low	0	0.312329
TCGA-EJ-A65J-01	0.22359	-0.300215	low	0	1.23562
TCGA-XK-AAJT-01	0.223649	-0.298476	low	0	3.92877
TCGA-EJ-7797-01	0.223669	-0.297862	low	0	2.69315
TCGA-J4-8198-01	0.223731	-0.29603	low	0	1.68219
TCGA-G9-6377-01	0.223888	-0.291367	low	0	2.62466
TCGA-EJ-5499-01	0.223904	-0.290886	low	0	3.87671
TCGA-2A-A8VT-01	0.22414	-0.283865	low	0	3.76164
TCGA-M7-A723-01	0.224143	-0.283763	low	0	2.09041
TCGA-G9-6336-01	0.224328	-0.278266	low	0	5.66575
TCGA-HC-7080-01	0.224357	-0.277419	low	1	2.44932
TCGA-G9-7509-01	0.224365	-0.277168	low	0	4.41096
TCGA-ZG-A9ND-01	0.224365	-0.277161	low	0	1.12329
TCGA-EJ-A46I-01	0.224369	-0.277037	low	0	1.83014
TCGA-EJ-A7NN-01	0.224468	-0.2741	low	1	0.539726
TCGA-EJ-5509-01	0.225044	-0.256977	low	0	4.01096
TCGA-KK-A8I7-01	0.225228	-0.251505	low	1	2.98082
TCGA-XA-A8JR-01	0.225326	-0.248587	low	0	1.03014
TCGA-XK-AAIR-01	0.225471	-0.244269	low	0	2.66301
TCGA-YL-A8SP-01	0.22558	-0.241045	low	1	5.57808
TCGA-YL-A8SR-01	0.225699	-0.237501	low	0	0.747945
TCGA-HC-A6AP-01	0.225824	-0.233798	low	0	0.194521
TCGA-HC-7212-01	0.226042	-0.227294	low	0	2.38356
TCGA-ZG-A8QY-01	0.226122	-0.224912	low	0	1.10685
TCGA-EJ-5512-01	0.226204	-0.222479	low	0	4.74795
TCGA-G9-6361-01	0.226307	-0.219425	low	0	3.87671
TCGA-CH-5790-01	0.226312	-0.219262	low	0	2.66849
TCGA-V1-A8X3-01	0.226414	-0.21625	low	0	0.553425
TCGA-KK-A7B4-01	0.22677	-0.205669	low	1	1.74521
TCGA-ZG-A9NI-01	0.226781	-0.20534	low	0	0.361644
TCGA-HC-A8D0-01	0.227106	-0.195657	low	0	2.12329
TCGA-EJ-A6RA-01	0.227201	-0.19283	low	1	0.967123
TCGA-XK-AAJR-01	0.227252	-0.191328	low	1	0.358904
TCGA-J4-A83M-01	0.227376	-0.187649	low	1	1.4274
TCGA-VP-A87H-01	0.227541	-0.18272	low	0	1.81644
TCGA-G9-7522-01	0.227775	-0.175772	low	0	2.95342
TCGA-EJ-7781-01	0.227816	-0.174544	low	0	2.93973
TCGA-KK-A8IB-01	0.227942	-0.170819	low	0	0.227397
TCGA-CH-5791-01	0.228373	-0.158	low	1	1.08493
TCGA-EJ-A65F-01	0.228454	-0.155591	low	1	0.205479
TCGA-KC-A7F6-01	0.228698	-0.148321	low	0	0.720548
TCGA-ZG-A9L5-01	0.228772	-0.146139	low	0	2.48767
TCGA-CH-5752-01	0.228957	-0.140632	low	0	2.58356
TCGA-HC-7818-01	0.229212	-0.13303	low	0	2.56986
TCGA-KK-A6E3-01	0.229593	-0.121729	low	0	5.63288
TCGA-HC-A4ZV-01	0.229733	-0.117537	low	0	0.0630137
TCGA-V1-A9OY-01	0.229945	-0.111235	low	0	2.92329
TCGA-G9-6379-01	0.23009	-0.106941	low	0	4.87123
TCGA-V1-A9ZK-01	0.230102	-0.106585	low	0	3.78904
TCGA-HC-7232-01	0.230529	-0.0938761	low	1	2.09863
TCGA-HC-A631-01	0.230644	-0.0904721	low	0	0.147945
TCGA-EJ-5522-01	0.230649	-0.0903076	low	0	5.69589
TCGA-EJ-5519-01	0.230672	-0.0896401	low	0	5.37534
TCGA-EJ-5515-01	0.230871	-0.0837248	low	0	5.01918
TCGA-YL-A9WK-01	0.231389	-0.0683232	low	1	2.76438
TCGA-G9-6363-01	0.231542	-0.0637622	low	0	3.77534
TCGA-V1-A9Z7-01	0.231848	-0.0546747	high	0	2.39452
TCGA-KK-A8IJ-01	0.231869	-0.0540309	high	1	0.841096
TCGA-EJ-AB27-01	0.232122	-0.0465249	high	0	0.39726
TCGA-YL-A8SB-01	0.232257	-0.042488	high	1	3.79178
TCGA-CH-5764-01	0.232397	-0.0383255	high	0	0.0849315
TCGA-VP-A879-01	0.232518	-0.0347293	high	0	1.99452
TCGA-YL-A8SJ-01	0.232524	-0.0345601	high	1	2.06027
TCGA-ZG-A9LY-01	0.232628	-0.0314688	high	0	1.0137
TCGA-HC-7747-01	0.232635	-0.0312721	high	0	2.04932
TCGA-EJ-5510-01	0.233132	-0.0164716	high	0	5.16986
TCGA-HC-7233-01	0.233145	-0.0160834	high	0	3.71233
TCGA-KK-A8IM-01	0.233329	-0.0106278	high	0	5.24658
TCGA-VN-A88O-01	0.233509	-0.00528167	high	0	1.31781
TCGA-G9-6356-01	0.23353	-0.00463254	high	0	3.92877
TCGA-EJ-7327-01	0.233824	0.00410042	high	0	2.52877
TCGA-YL-A8S8-01	0.233834	0.00440642	high	1	1.86027
TCGA-EJ-A8FN-01	0.233914	0.00678113	high	0	0.90137
TCGA-HC-8265-01	0.233951	0.0078829	high	0	1.32329
TCGA-ZG-A9LZ-01	0.234018	0.00985845	high	0	1.89589
TCGA-HC-A6HX-01	0.234187	0.0148836	high	0	0.10411
TCGA-J4-A67L-01	0.234326	0.0190216	high	0	2.10959
TCGA-EJ-7782-01	0.234425	0.0219655	high	0	3.19726
TCGA-ZG-A9N3-01	0.23449	0.023909	high	0	0.956164
TCGA-YL-A9WL-01	0.234573	0.0263713	high	1	2.0274
TCGA-KC-A4BV-01	0.234611	0.0274885	high	1	3.63836
TCGA-J4-A67Q-01	0.234638	0.0282928	high	0	2.67123
TCGA-CH-5750-01	0.23476	0.0319398	high	0	1.08493
TCGA-EJ-A46B-01	0.235094	0.0418534	high	0	1.8
TCGA-KK-A6E0-01	0.235282	0.0474349	high	1	2.57808
TCGA-G9-6385-01	0.235405	0.051101	high	0	2.27397
TCGA-EJ-7331-01	0.235685	0.0594457	high	0	2.03288
TCGA-EJ-7315-01	0.235764	0.0617941	high	0	2.76164
TCGA-KK-A7AV-01	0.236178	0.0741025	high	0	2.25205
TCGA-V1-A8WL-01	0.236629	0.0875144	high	0	5.33699
TCGA-XQ-A8TB-01	0.236821	0.0931988	high	0	2.10959
TCGA-M7-A71Y-01	0.236833	0.0935715	high	0	1.35068
TCGA-KK-A8IG-01	0.236897	0.0954743	high	0	6.86301
TCGA-CH-5744-01	0.237064	0.100425	high	0	0.164384
TCGA-CH-5737-01	0.237225	0.105234	high	0	0.249315
TCGA-V1-A8WV-01	0.237305	0.107601	high	0	1.87945
TCGA-KK-A8I6-01	0.23735	0.108943	high	0	1.83014
TCGA-EJ-A65E-01	0.237441	0.111648	high	0	1.14247
TCGA-EJ-7328-01	0.237609	0.116634	high	0	2.30685
TCGA-G9-6498-01	0.237992	0.128033	high	1	3.67671
TCGA-EJ-7314-01	0.238045	0.129596	high	0	3.15068
TCGA-CH-5788-01	0.238158	0.132966	high	0	2.24932
TCGA-J4-A67M-01	0.238612	0.146475	high	0	2.57808
TCGA-V1-A9OL-01	0.239068	0.160022	high	1	0.287671
TCGA-J9-A8CL-01	0.239089	0.160646	high	1	0.361644
TCGA-YL-A8SI-01	0.239326	0.167696	high	1	3.89863
TCGA-EJ-5521-01	0.239354	0.168539	high	0	6.24384
TCGA-V1-A8MK-01	0.239469	0.171962	high	0	1.39178
TCGA-J4-A67R-01	0.239632	0.176788	high	0	2.49315
TCGA-EJ-5507-01	0.239659	0.177588	high	0	3.99178
TCGA-G9-6367-01	0.23967	0.17792	high	0	3.34795
TCGA-G9-6353-01	0.239915	0.185218	high	0	4.22466
TCGA-HC-A48F-01	0.24013	0.191601	high	0	1.86301
TCGA-EJ-5508-01	0.240328	0.197506	high	0	5.38356
TCGA-HC-A76W-01	0.240381	0.199072	high	0	0.583562
TCGA-VP-A87J-01	0.2405	0.202613	high	0	4.86027
TCGA-V1-A9OA-01	0.240689	0.208219	high	0	1.74247
TCGA-J9-A8CM-01	0.2407	0.208562	high	1	0.942466
TCGA-EJ-8472-01	0.240976	0.216758	high	1	0.536986
TCGA-HC-8260-01	0.241015	0.217916	high	0	1.87945
TCGA-EJ-A6RC-01	0.241248	0.22484	high	0	2.39178
TCGA-EJ-5501-01	0.241291	0.226136	high	0	3.73973
TCGA-J4-AATZ-01	0.24162	0.235915	high	1	0.216438
TCGA-EJ-5542-01	0.241742	0.239554	high	0	4.14521
TCGA-HC-A8D1-01	0.24176	0.240064	high	0	1.56986
TCGA-G9-6365-01	0.241782	0.240716	high	0	3.73425
TCGA-EJ-A46D-01	0.242417	0.259617	high	0	1.71507
TCGA-KK-A8IH-01	0.242484	0.261614	high	0	5.51507
TCGA-KK-A7B3-01	0.242593	0.264855	high	1	0.805479
TCGA-EJ-A65B-01	0.242845	0.272338	high	0	1.94521
TCGA-G9-7510-01	0.242901	0.274009	high	0	3.24658
TCGA-V1-A8MU-01	0.242929	0.274827	high	0	5.13973
TCGA-EJ-8469-01	0.243011	0.277265	high	1	5.27397
TCGA-EJ-5494-01	0.243138	0.281043	high	0	4.04658
TCGA-KC-A7F3-01	0.243281	0.285306	high	0	1.82192
TCGA-G9-6333-01	0.243511	0.292133	high	0	6.75342
TCGA-V1-A9Z8-01	0.243931	0.30462	high	0	2.26575
TCGA-HC-7821-01	0.244077	0.308958	high	0	2.61918
TCGA-EJ-5497-01	0.244096	0.309542	high	0	1.10959
TCGA-TP-A8TT-01	0.244169	0.311708	high	0	1.4411
TCGA-VN-A88R-01	0.24422	0.313222	high	1	1.40274
TCGA-EJ-5531-01	0.24444	0.319778	high	0	3.48767
TCGA-XK-AAJU-01	0.244816	0.330945	high	0	4.31781
TCGA-HC-8264-01	0.244883	0.332934	high	0	0.131507
TCGA-CH-5794-01	0.244939	0.334618	high	0	2.41644
TCGA-V1-A9ZG-01	0.24517	0.341469	high	0	4.15616
TCGA-HC-7745-01	0.245265	0.344282	high	0	1.97534
TCGA-KC-A4BN-01	0.245422	0.34896	high	0	4.9726
TCGA-KK-A7B1-01	0.245475	0.35053	high	0	2.91233
TCGA-FC-A66V-01	0.246105	0.369265	high	0	1.43562
TCGA-J4-A67O-01	0.246115	0.369583	high	0	2.29863
TCGA-FC-A8O0-01	0.246157	0.370826	high	0	1.68767
TCGA-V1-A9O9-01	0.246407	0.378242	high	0	7.86301
TCGA-YL-A9WJ-01	0.246543	0.382312	high	1	4.04384
TCGA-ZG-A9LB-01	0.246671	0.386115	high	0	1.59726
TCGA-J4-A83I-01	0.247065	0.397829	high	0	1.87671
TCGA-J4-8200-01	0.247093	0.398641	high	0	3.33699
TCGA-EJ-7794-01	0.247224	0.402542	high	0	3.57808
TCGA-KK-A6E1-01	0.247669	0.415788	high	0	6.02192
TCGA-G9-6347-01	0.247856	0.421337	high	0	5.72329
TCGA-ZG-A9LU-01	0.247881	0.422078	high	0	1.5863
TCGA-EJ-5524-01	0.24809	0.42831	high	1	0.726027
TCGA-ZG-A8QX-01	0.248415	0.437963	high	0	1.21096
TCGA-EJ-A7NK-01	0.248502	0.440558	high	0	1.30411
TCGA-HC-7742-01	0.24856	0.442275	high	0	2.56986
TCGA-HC-8258-01	0.248572	0.442646	high	0	2.32055
TCGA-EJ-5525-01	0.248595	0.44332	high	1	1.49589
TCGA-YL-A8HO-01	0.248933	0.453373	high	1	2.92603
TCGA-CH-5753-01	0.249223	0.461982	high	0	0.0849315
TCGA-G9-6384-01	0.24958	0.472619	high	0	2.09589
TCGA-V1-A8WN-01	0.249601	0.473242	high	0	2.53151
TCGA-EJ-5495-01	0.249784	0.478682	high	0	4.82192
TCGA-HC-7209-01	0.250008	0.485331	high	0	1.20548
TCGA-HC-7211-01	0.250246	0.492422	high	0	3.34521
TCGA-KK-A6E6-01	0.250276	0.493289	high	0	9.44384
TCGA-CH-5792-01	0.250342	0.495262	high	0	0.249315
TCGA-J4-A67T-01	0.251125	0.518549	high	0	0.50137
TCGA-EJ-A7NJ-01	0.251229	0.521638	high	0	0.539726
TCGA-KK-A8I5-01	0.251276	0.523038	high	0	8.48219
TCGA-EJ-8470-01	0.25166	0.534448	high	0	3.17534
TCGA-EJ-8468-01	0.251667	0.534662	high	0	6.43014
TCGA-HC-A6AS-01	0.252227	0.551313	high	0	0.120548
TCGA-CH-5766-01	0.25228	0.552898	high	0	0.0849315
TCGA-VN-A88K-01	0.252437	0.557563	high	0	2.12603
TCGA-KC-A7FE-01	0.252676	0.564671	high	0	0.964384
TCGA-J4-A83L-01	0.252709	0.565645	high	0	1.9726
TCGA-EJ-5516-01	0.252955	0.572949	high	0	5.17534
TCGA-EJ-7783-01	0.253231	0.581175	high	0	2.15616
TCGA-ZG-A9L1-01	0.25364	0.593326	high	0	3.56712
TCGA-KK-A59V-01	0.253666	0.594102	high	0	9.42466
TCGA-ZG-A9L9-01	0.253774	0.597314	high	1	0.139726
TCGA-HC-7081-01	0.254258	0.611717	high	0	3.11233
TCGA-V1-A9ZR-01	0.254624	0.622586	high	0	3.72877
TCGA-VN-A88L-01	0.254846	0.62918	high	0	2.04384
TCGA-YL-A8HJ-01	0.255316	0.643169	high	0	4.4137
TCGA-ZG-A9L6-01	0.255869	0.659615	high	1	1.81918
TCGA-EJ-5506-01	0.255953	0.662123	high	0	3.78356
TCGA-CH-5754-01	0.256204	0.669558	high	0	0.169863
TCGA-HC-7748-01	0.256664	0.683239	high	0	2.16986
TCGA-ZG-A9M4-01	0.257019	0.693798	high	0	1.49863
TCGA-ZG-A9L0-01	0.257626	0.711867	high	0	0.972603
TCGA-CH-5751-01	0.257934	0.721001	high	1	1
TCGA-EJ-5503-01	0.259271	0.760774	high	0	3.81096
TCGA-J9-A52B-01	0.25942	0.765206	high	1	0.156164
TCGA-G9-6338-01	0.259502	0.767643	high	0	5.55616
TCGA-G9-A9S0-01	0.260063	0.78431	high	1	1.1589
TCGA-EJ-5502-01	0.260367	0.793356	high	0	3.20822
TCGA-EJ-5527-01	0.260402	0.794407	high	0	4.87123
TCGA-HC-8266-01	0.260437	0.795427	high	0	1.29589
TCGA-HC-A9TE-01	0.260454	0.795959	high	1	0.591781
TCGA-CH-5762-01	0.260732	0.804219	high	0	3.66849
TCGA-EJ-A8FU-01	0.260867	0.80822	high	0	0.378082
TCGA-KK-A8I4-01	0.260973	0.81138	high	1	3.18356
TCGA-HC-7740-01	0.261321	0.821727	high	0	1.96438
TCGA-EJ-5526-01	0.261467	0.826066	high	1	1.47123
TCGA-VP-AA1N-01	0.261671	0.832145	high	0	3.73973
TCGA-EJ-5518-01	0.262277	0.850144	high	1	5.76438
TCGA-VP-A878-01	0.262333	0.851831	high	1	0.268493
TCGA-EJ-A7NG-01	0.262553	0.858373	high	0	1.18356
TCGA-KK-A6DY-01	0.262785	0.86526	high	0	11.7671
TCGA-CH-5739-01	0.263231	0.878518	high	0	1.83836
TCGA-ZG-A8QZ-01	0.263765	0.894399	high	0	0.843836
TCGA-G9-6348-01	0.264255	0.90897	high	0	4.15068
TCGA-FC-A4JI-01	0.264509	0.916532	high	0	2.40274
TCGA-EJ-7792-01	0.26475	0.923692	high	0	3.82466
TCGA-M7-A720-01	0.265066	0.933076	high	0	1.05205
TCGA-ZG-A9LS-01	0.265079	0.933473	high	0	1.4137
TCGA-EJ-7785-01	0.265086	0.933669	high	0	3.22466
TCGA-XJ-A83H-01	0.265353	0.94163	high	0	3.50685
TCGA-EJ-7330-01	0.265478	0.945343	high	0	0.523288
TCGA-EJ-7791-01	0.265515	0.946441	high	0	3.06301
TCGA-ZG-A9L2-01	0.266451	0.974282	high	1	0.493151
TCGA-J9-A52E-01	0.26699	0.990289	high	0	0.884932
TCGA-V1-A9O5-01	0.267093	0.993351	high	1	0.339726
TCGA-KK-A7B2-01	0.267771	1.01351	high	1	1.89589
TCGA-ZG-A9LN-01	0.268095	1.02316	high	0	0.315068
TCGA-YL-A9WY-01	0.26811	1.0236	high	1	2.09589
TCGA-SU-A7E7-01	0.268221	1.02689	high	0	1.50959
TCGA-J9-A8CK-01	0.268495	1.03506	high	0	0.879452
TCGA-CH-5789-01	0.26888	1.04651	high	0	0.832877
TCGA-CH-5771-01	0.2692	1.056	high	0	1.08493
TCGA-KK-A8IL-01	0.269901	1.07687	high	0	1.72055
TCGA-XJ-A9DK-01	0.27002	1.08038	high	0	0.753425
TCGA-J4-A83J-01	0.270031	1.08073	high	0	1.90685
TCGA-G9-7521-01	0.270522	1.09533	high	0	2.58082
TCGA-HC-7213-01	0.271308	1.1187	high	1	0.465753
TCGA-J4-A6G1-01	0.272081	1.14169	high	0	2.10685
TCGA-EJ-5498-01	0.272769	1.16214	high	0	4.71233
TCGA-ZG-A8QW-01	0.272874	1.16525	high	0	0.257534
TCGA-HC-7736-01	0.273297	1.17785	high	0	3.02192
TCGA-KK-A8I9-01	0.273314	1.17833	high	1	2.57534
TCGA-XQ-A8TA-01	0.273425	1.18164	high	1	0.4
TCGA-CH-5769-01	0.276505	1.27324	high	0	0.169863
TCGA-H9-A6BX-01	0.276974	1.28718	high	0	2.57808
TCGA-FC-7708-01	0.278344	1.3279	high	0	2.36712
TCGA-HI-7168-01	0.27961	1.36554	high	1	6.86301
TCGA-XK-AAIV-01	0.28105	1.40836	high	0	3.10411
TCGA-YL-A9WX-01	0.281282	1.41528	high	1	4.12603
TCGA-HC-7817-01	0.283965	1.49507	high	0	2.54247
TCGA-HI-7170-01	0.284305	1.50517	high	0	6.90959
TCGA-YL-A8HK-01	0.285318	1.5353	high	1	3.76986
TCGA-HC-7210-01	0.286309	1.56476	high	0	2.37808
TCGA-ZG-A9L4-01	0.286356	1.56614	high	0	3.03562
TCGA-KC-A4BL-01	0.286699	1.57635	high	1	0.528767
TCGA-VP-A87C-01	0.287014	1.58572	high	0	4.63014
TCGA-YL-A8SK-01	0.288284	1.62347	high	0	3.85753
TCGA-FC-7961-01	0.28839	1.62662	high	0	1.28493
TCGA-KK-A8IC-01	0.290207	1.68067	high	1	2.90411
TCGA-CH-5738-01	0.290918	1.70181	high	0	0.580822
TCGA-V1-A8WW-01	0.291754	1.72668	high	0	2.95342
TCGA-CH-5763-01	0.293045	1.76506	high	0	1
TCGA-XJ-A9DI-01	0.293889	1.79014	high	0	4.00274
TCGA-EJ-5514-01	0.293979	1.79283	high	0	5.01096
TCGA-J4-AATV-01	0.294323	1.80305	high	0	1.51507
TCGA-G9-6370-01	0.294824	1.81795	high	0	3.16712
TCGA-G9-7523-01	0.295308	1.83233	high	0	2.34795
TCGA-HC-7737-01	0.296584	1.87028	high	0	2.9863
TCGA-CH-5745-01	0.297965	1.91133	high	0	0.249315
TCGA-HC-A9TH-01	0.299654	1.96157	high	1	0.961644
TCGA-VN-A88I-01	0.301625	2.02019	high	0	0.736986
TCGA-CH-5761-01	0.304048	2.09222	high	0	0.0767123
TCGA-KK-A6E7-01	0.30542	2.13303	high	1	2.53425
TCGA-J4-A6G3-01	0.305455	2.13407	high	1	1.69315
TCGA-CH-5743-01	0.306405	2.16233	high	1	1.16438
TCGA-J9-A52C-01	0.308725	2.2313	high	0	0.487671
TCGA-KK-A59X-01	0.310323	2.27881	high	1	6.11781
TCGA-EJ-AB20-01	0.314205	2.39424	high	0	0.358904
TCGA-TK-A8OK-01	0.320673	2.58656	high	0	0.0739726
TCGA-YL-A9WH-01	0.32391	2.68283	high	0	1.16986
TCGA-KC-A4BR-01	0.325981	2.74442	high	1	2.8
TCGA-V1-A9O7-01	0.328053	2.80603	high	1	2.24384
TCGA-VP-A87E-01	0.334979	3.01197	high	0	5.58082
TCGA-ZG-A9MC-01	0.348361	3.40987	high	0	1.24658
TCGA-EJ-A46E-01	0.352569	3.53503	high	0	1.43562
TCGA-EJ-A46H-01	0.353927	3.57541	high	0	1.98356
TCGA-4L-AA1F-01	0.355157	3.61195	high	0	0.958904
TCGA-HC-7079-01	0.358782	3.71976	high	1	1.0411
